# Supplementary material for: Hybridization between plasmonic and photonic modes in laser-induced self-organized quasi-random plasmonic metasurfaces
Source: Royal Society of Chemistry journal article supplement (doi:10.1039/d3nr05569h), 2023-01-01
Supplement: d3nr05569h1.pdf [file d3nr05569h1.pdf]

# Hybridization between plasmonic and photonic modes in laser-induced self-organized quasi-random plasmonic metasurfaces

*Van Doan Le<sup>1</sup>, Yaya Lefkir<sup>1</sup>, Nathalie Destouches<sup>1\*</sup>*

*<sup>1</sup>Univ Lyon, UJM-Saint-Etienne, CNRS, Institut d'Optique Graduate School,*

*Laboratoire Hubert Curien UMR 5516, F-42023 Saint-Etienne, France.*

*\*Corresponding author: [nathalie.destouches@univ-st-etienne.fr](mailto:nathalie.destouches@univ-st-etienne.fr)*

## 1. Size distribution.

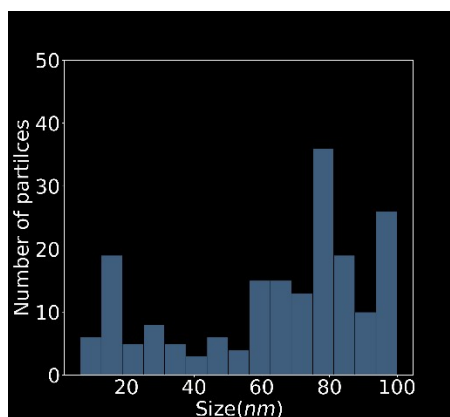

**Figure S1.** Size distribution of the sample irradiated by the laser at wavelength of 488 nm, power of 250 mW and scan speed of 300  $\mu\text{m/s}$ .

## 2. Chemical components and Raman spectrum of the sample.

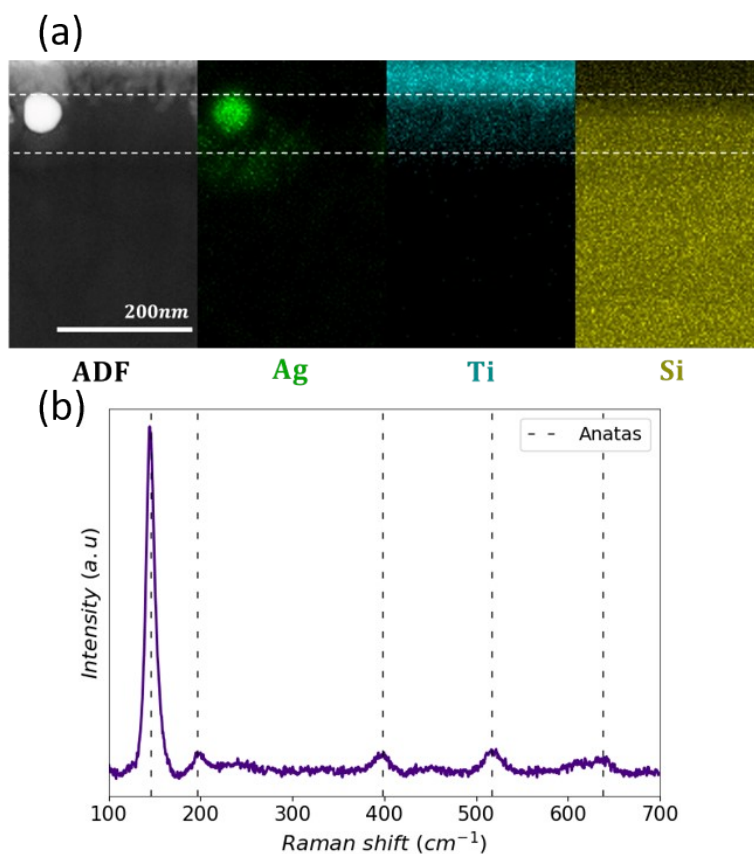

Figure S2. Characterization of the sample illuminated by laser at 488 nm, power = 250 mW and scan speed = 300  $\mu\text{m/s}$  (a) Chemical analysis of the sample cross-section by annular dark field (ADF) electron microscopy and energy-dispersive spectroscopy that highlights Ag, Ti and Si atomic content. Dashed white lines indicate the layer interface. (b) Raman spectrum of the sample after background removal.<sup>1,2</sup>

### 3. Optimization of the intermediate layer ( $n_2$ )

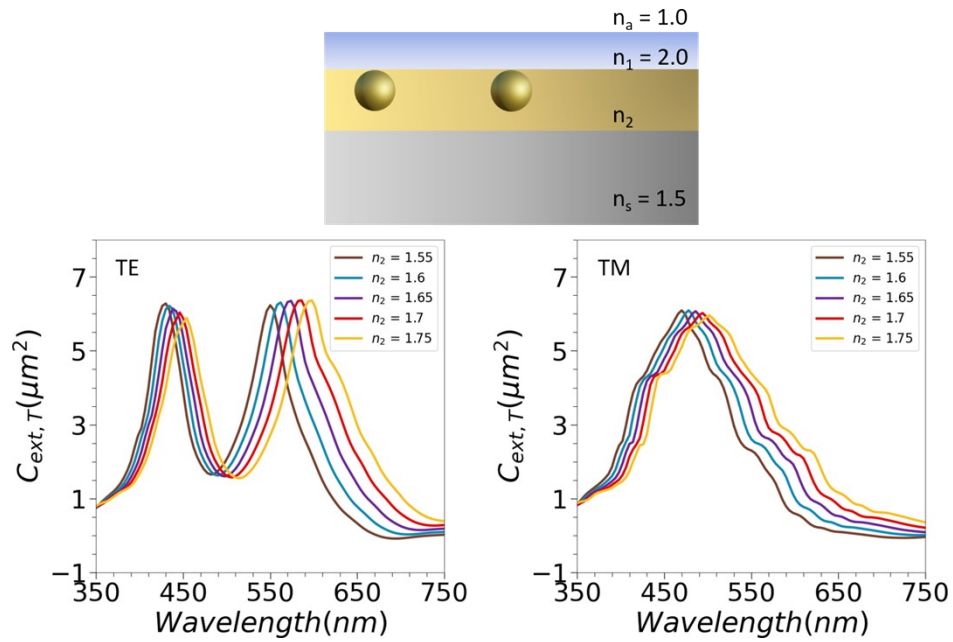

**Figure S3.** Extinction cross-section in transmission side of TE and TM polarization of the as-fabricated sample when varying refractive index of the intermediate layer. The refractive index  $n_2 = 1.65$  is chosen since it provides the closest match to the measured results.

### 4. Extinction of experiment and simulation.

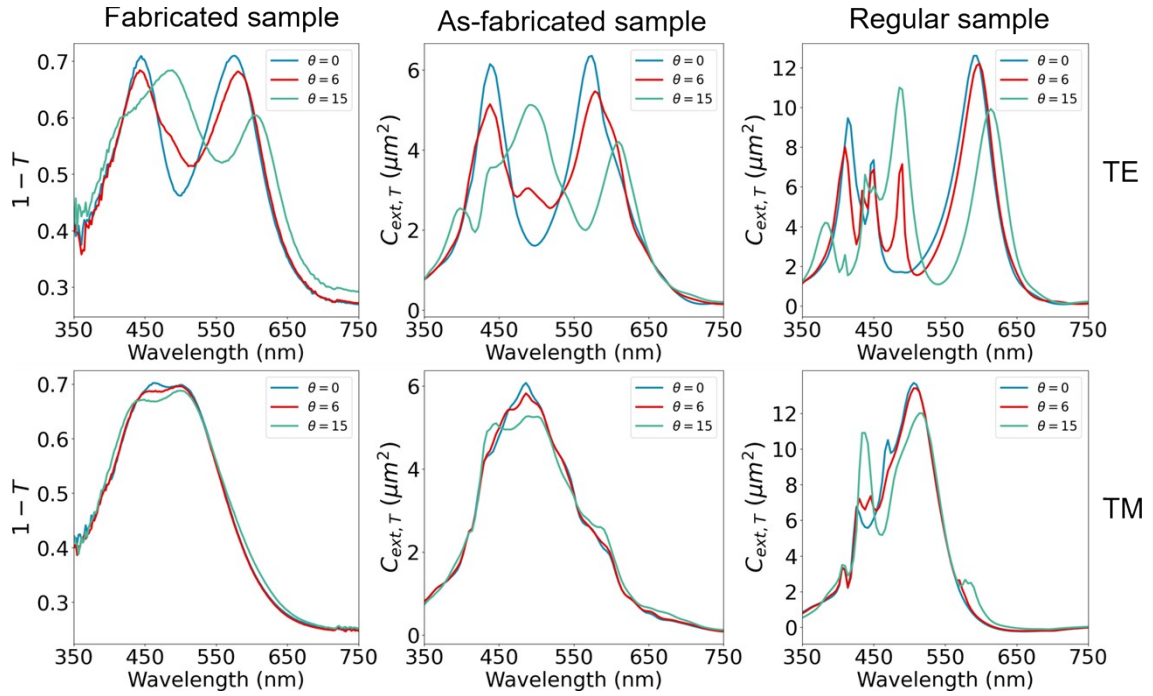

**Figure S4.** Experimental extinction of the fabricated sample ( $1 - T$ ) and simulated extinction cross-section in transmission side of the as-fabricated and regular samples for TE and TM polarization under different incidence angles. The sample is described in Supplementary Figure S1.

**5. Multipole extraction of as-fabricated sample and regular sample.**

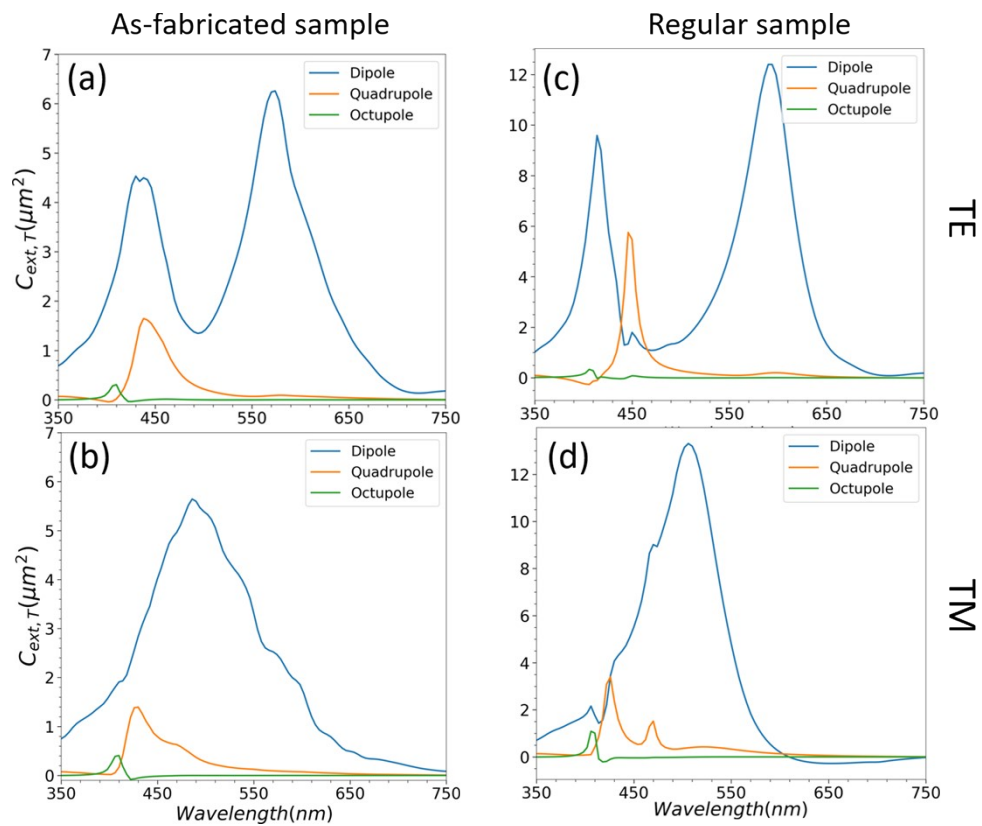

**Figure S5.** Multipole decomposition of the extinction cross-section for TE and TM polarization of as-fabricated sample (a-b) and regular sample (c-d) respectively.

## 6. Positional disorder and nanoparticle array.

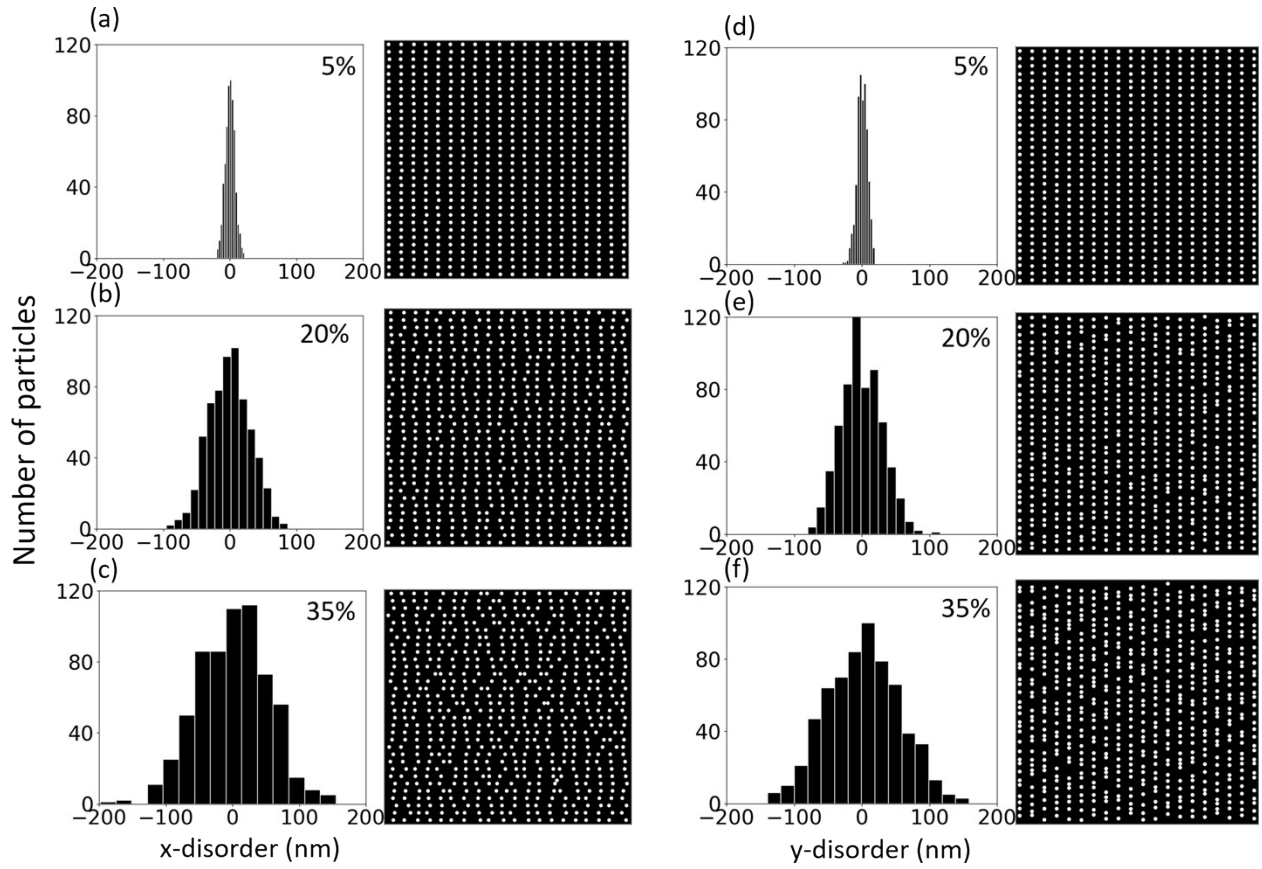

**Figure S6.** Introduction of disorder in the regular structure. Histogram of the distance from the periodic array of the nanoparticle center along x or y and the spatial distribution of silver nanoparticles in the simulated structure. The disorder is increasing from the top to the bottom row by broadening the position histograms (5 – 35%) for x-disorder (a, b, c) and y-disorder (d, e, f), respectively.

## 7. Effect of size distribution

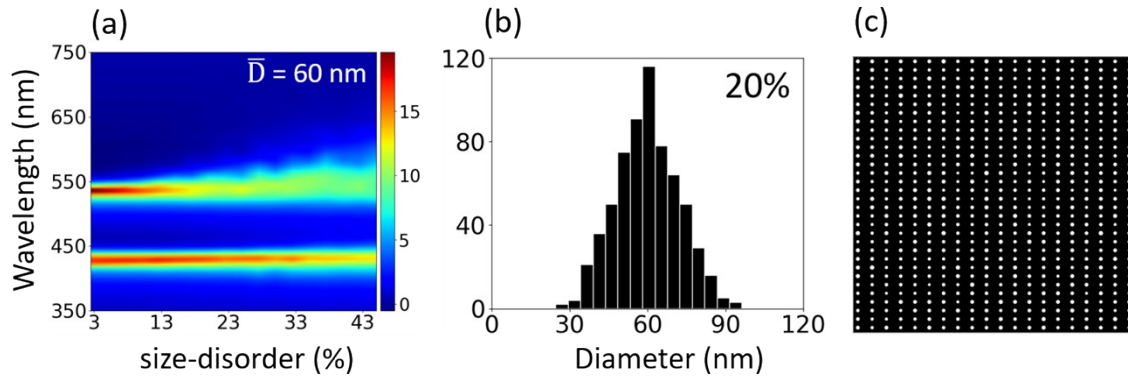

**Figure S7.** (a) Extinction efficiency for size distribution with the mean diameter of 60 nm. (b, c) Histogram and nanoparticle array of 20% size disorder, respectively. The higher disorder corresponds to broader histogram. When varying the size, we keep the regular position of nanoparticles.

## 8. Spectral variation for array of NP = 10 x 16

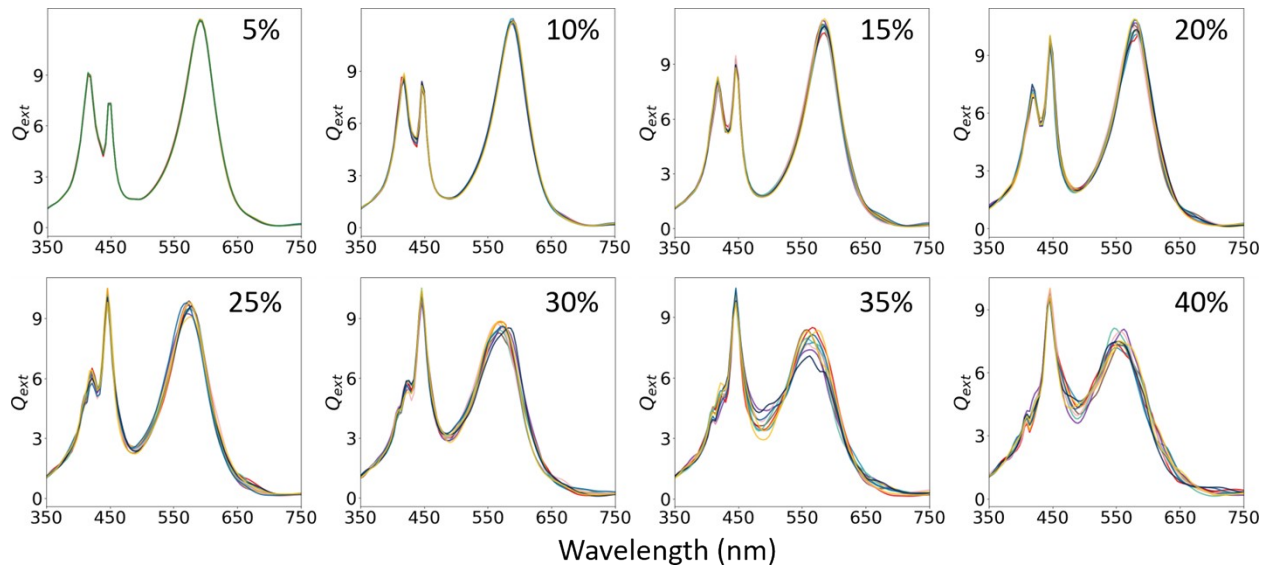

**Figure S8.** Spectral variation of ten simulations for array of NP = 10 x 16 with increasing x-disorder (5% - 40%).

## 9. Spectral variation for array with increasing size at x-disorder = 20%

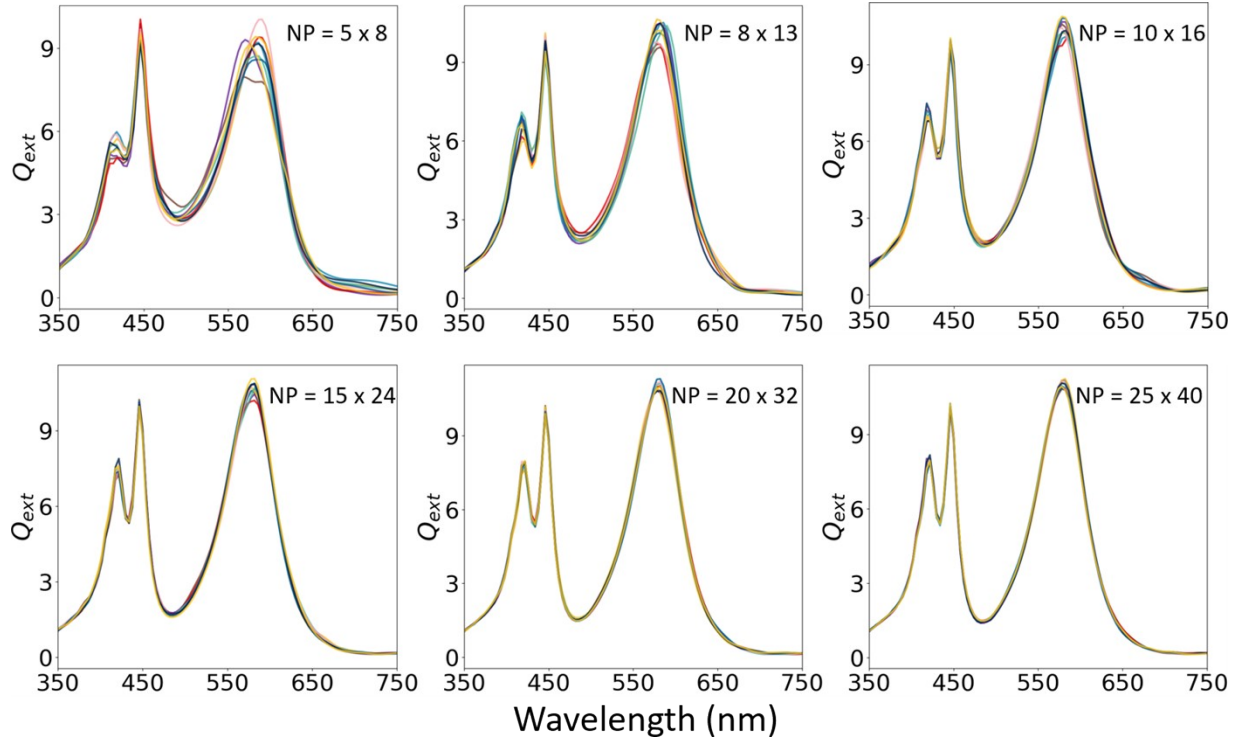

**Figure S9.** Spectral variation of ten simulations for array with increasing size from NP = 40 to NP = 1000 at x-disorder = 20%.

## 10. Quantify the spatial disorder of as-fabricated sample

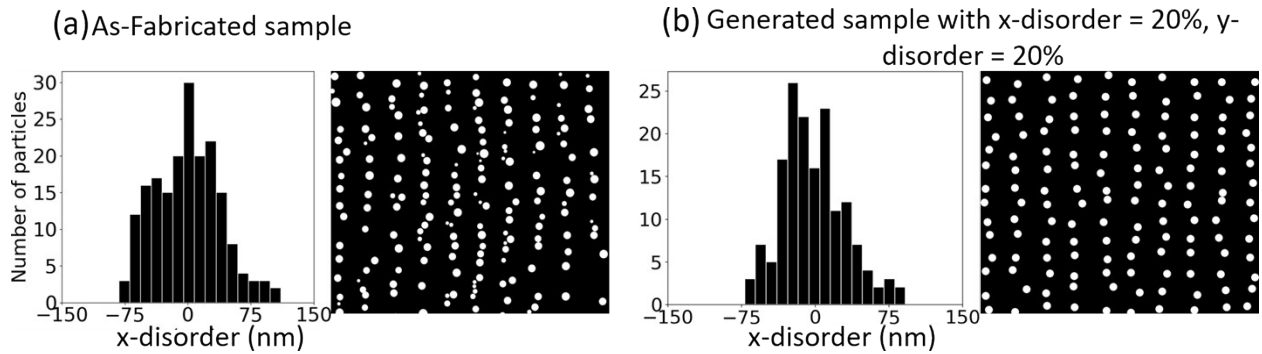

**Figure S10.** Histogram and nanoparticle array. (a) for as-fabricated sample and (b) for a generated sample with x-disorder = 20% and y-disorder = 20%.



## 11. Simulation of the as-fabricated nanoparticle array in a homogeneous medium

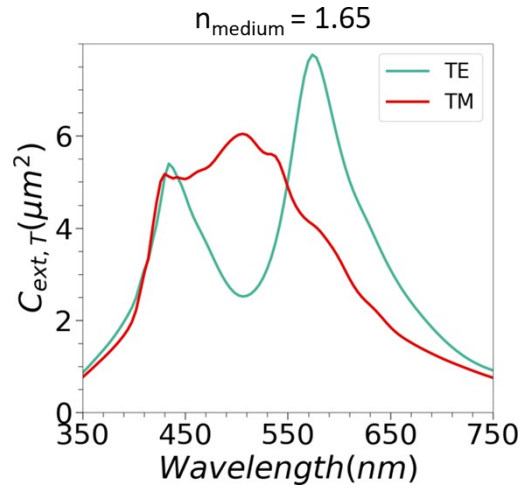

**Figure S11.** Extinction cross-section in transmission side of the as-fabricated nanoparticle array (as shown in Figure 1d) embedded in a homogeneous medium with  $n = 1.65$ . TE, TM indicate incident polarizations oriented parallel and perpendicular to the grating lines respectively.

## 12. Extinction cross-section and nearfield distributions for TM polarization.

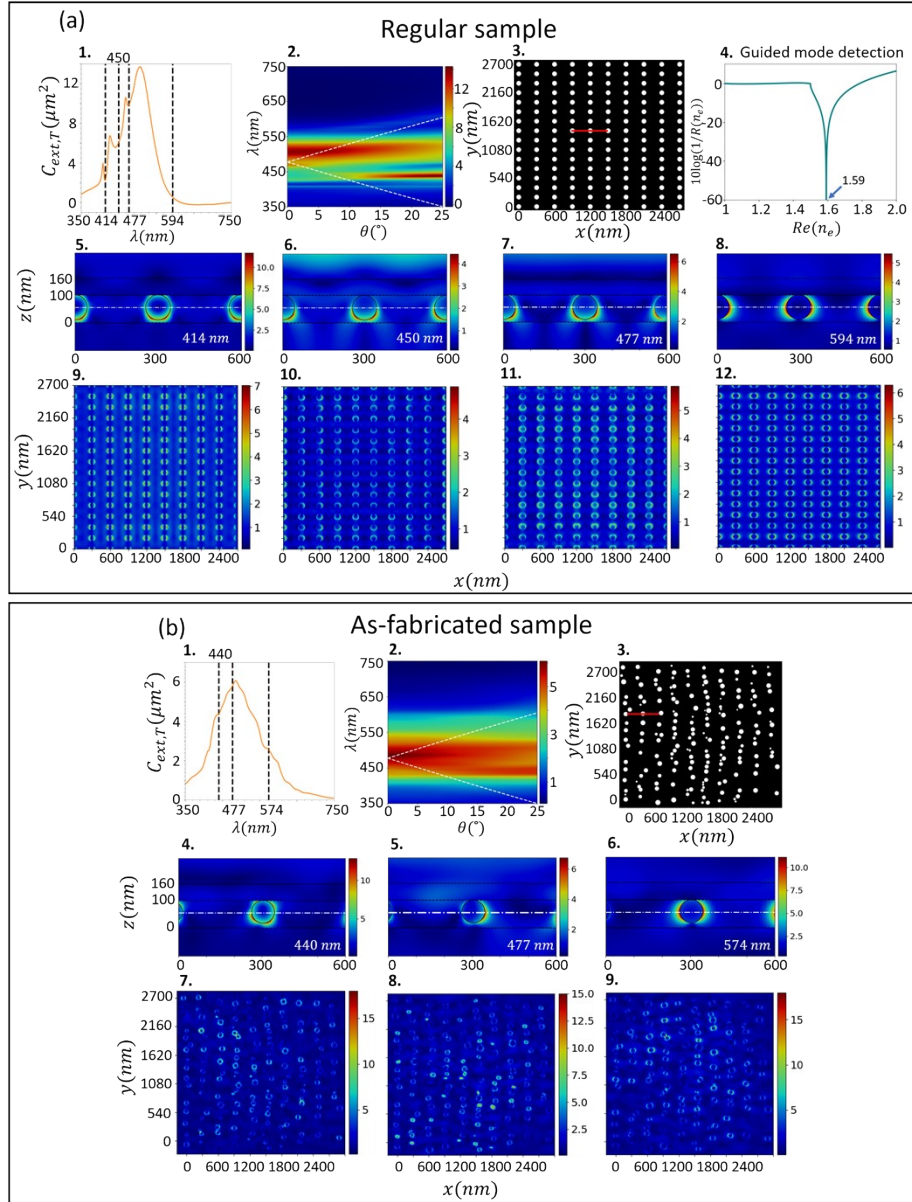

**Figure S12.** Spectral variations of  $C_{\text{ext},T}$  under normal incidence for (a.1) the regular and (b.1) as-fabricated sample. The vertical dotted lines indicate the wavelengths at which the near field is calculated below. Spectral and angular maps of  $C_{\text{ext},T}$  for (a.2) the regular and (b.2) as-fabricated sample. The white dashed lines indicate the guided modes excited by  $\pm 1$  diffraction orders. Plan-view of the (a.3) regular and (b.3) real-like NP arrays. (a.4) Pole of the reflection coefficient  $R$  of the two-layer system without nanoparticles. (a.5-12, b.4-9) cross-section and

plan-view of the near field intensity distribution at selected wavelengths (shown in fig. a.1 and b.1 respectively). The nearfield intensities shown in plan-view are calculated on the white dashed dotted lines drawn in the cross-section pictures. The nearfield intensities shown in cross-section are calculated on the red lines in figure a.3 and b.3. The black dashed lines indicate the layer interfaces. All calculations are implemented for TM polarization.

**13. Extinction in transmission side with incident plane is parallel to the yz-plane.**

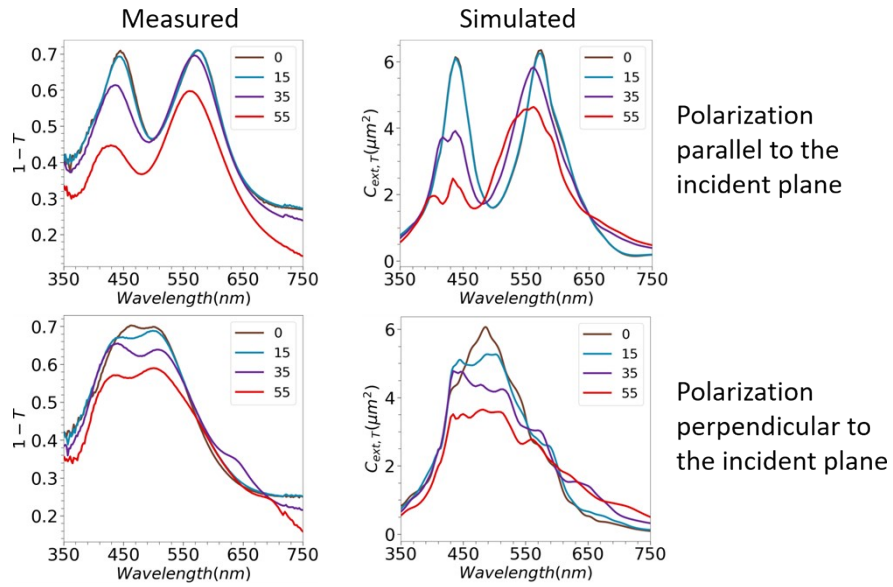

**Figure S13.** Extinction in transmission side of measured and simulated samples for two incident polarizations at different incident angle. The incident plane is parallel to the yz-plane.

**14. Nearfield intensity at the middle of TiO<sub>2</sub> layer under normal incidence.**

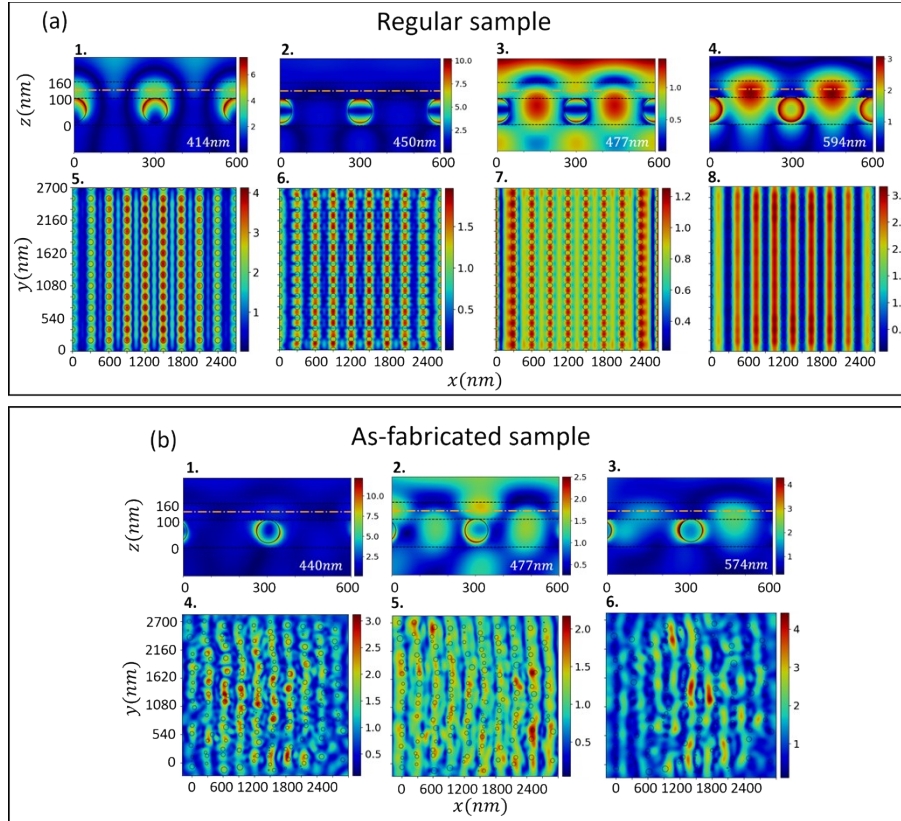

**Figure S14.** (a-b) Nearfield intensity on cross-section and plan-views ( $z = 130$  nm) at the selected wavelengths, where the spectra exhibit extinction dips or peaks as shown in Figure 3, under normal incidence of the regular sample and real-like sample respectively. The orange dashed dotted lines in cross-section view indicate where the plan-views are calculated. The black circles in plan-views represent the NPs positions and sizes.

### 15. Effect of layer thickness on the coupling.

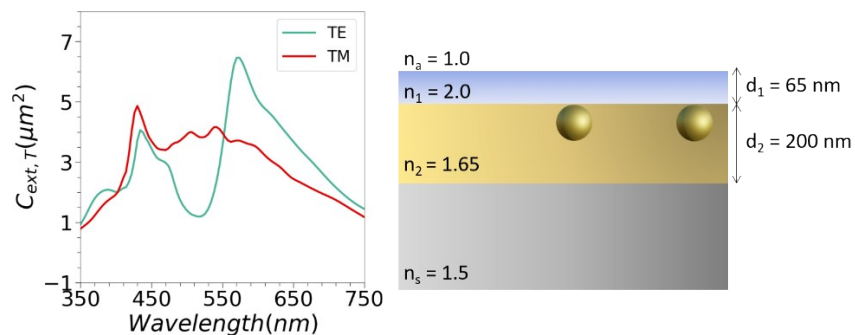

**Figure S15.** Extinction cross-section in transmission side of the as-fabricated sample (Figure 1d in the manuscript) simulated with thicker layer of  $n_2 = 1.65$  for TE and TM polarization.

**1.6 SEM picture in cross-section and size distribution of the sample illuminated by laser at 647 nm, power = 500 mW and scan speed = 300  $\mu\text{m/s}$ .**

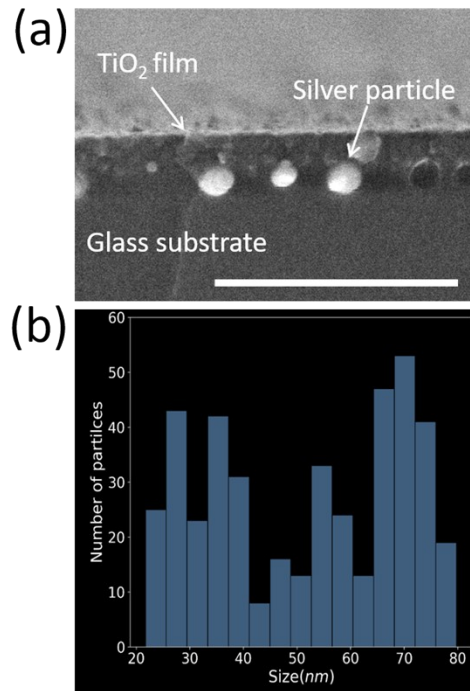

**Figure S16.** (a) Cross-section view and (b) size distribution of the sample processed by laser at 647 nm, 500 mW and 300  $\mu\text{m/s}$ . The scale bar is 500 nm

## 11. References

- (1) Eilers, P. H. C. A Perfect Smoother. *Anal. Chem.* **2003**, 75, 3631–3636.
- (2) He, S.; Zhang, W.; Liu, L.; Huang, Y.; He, J.; Xie, W.; Wu, P.; Du, C. Baseline Correction for Raman Spectra Using an Improved Asymmetric Least Squares Method. *Anal. Methods* **2014**, 6, 4402–4407.
